# Supplementary material for: Aberrant sorting of hippocampal complex pyramidal cells in type I lissencephaly alters topological innervation
Source: eLife. 2020 Jun 19;9:e55173. doi: 10.7554/eLife.55173 (PMC7340499; doi:10.7554/eLife.55173)
Supplement: Figure 1—source data 1. [file elife-55173-fig1-data1.xlsx]

## Sheet: Distal_ca1
DISTAL CA1									Values represent the fraction of identified cells in the subband region of interest expressing calbindin.
WT				LIS					IE - calbindin somas in region, divided by dapi cells identified in region
deep	sup			deep	sup
0.073	0.2625			0.241	0.017				Wt PCL is divided in half radially for comparison
0.1647	0.256			0.207	0.069
0.047	0.2747			0.3977	0.04242
0.327	0.2461			0.184	0.0373
0.18055	0.25925			0.0833	0
0.0136	0.2439			0.229	0.0877
0	0.1923			0.0813	0.09375
0.0337	0.225			0.21212	0.03968
0.0533	0.333			0.202	0.0878
0	0.27536			0.12925	0.0068
0.1315	0.156627			0.097	0.0409
0.0459	0.2894			0.09655	0
0.0891875	0.251178			0.180018	0.0435292
0.0278387	0.0131082			0.027584	0.00996311
Data in 1E

## Sheet: Proximal_ca1
PROXIMAL CA1									Values represent the fraction of identified cells in the subband region of interest expressing calbindin.
WT				LIS					IE - calbindin somas in roi, divided by dapi cells identified in roi
deep	sup			deep	sup
0.185185	0.24242			0.1702	0.14966
0.20618	0.46428			0.0582	0.2011
0.3378	0.29347			0.173	0.32948
0.21126	0.17808			0.2222	0.1314
0.1909	0.35106			0.19259	0.1302
0.1357	0.322314			0.045455	0.1674
0.0889	0.2636			0.05	0.21757
0.14814	0.271845			0.08	0.298851
0.216495	0.269663			0	0.049
0.09	0.3608			0.1854	0.2484
0.06	0.284			0.1538	0.165414
0.0879	0.2967
0.163205	0.299853			0.120986	0.189861
0.0225152	0.0204711			0.0227093	0.0243517
Data in 1E

## Sheet: Distal_normd_histo
Dist Bin, nrmd	WT count	WT normd		LIS count	LIS normd		*Distances are normalized measures from the Oriens toward the Radiatum -( not PCL depth as used later)
0	0	0		4	0.007
0.05	0	0		68	0.114
0.1	1	0.0024		119	0.199
0.15	0	0		137	0.23
0.2	6	0.015		47	0.079
0.25	60	0.145		48	0.08
0.3	112	0.2712		42	0.07
0.35	124	0.3		19	0.032
0.4	49	0.119		6	0.01
0.45	8	0.019		6	0.01
0.5	5	0.012		7	0.012
0.55	2	0.005		10	0.017
0.6	5	0.012		14	0.023
0.65	6	0.015		6	0.01
0.7	4	0.009		15	0.025
0.75	5	0.012		34	0.057
0.8	16	0.039		11	0.018
0.85	8	0.019		0	0
0.9	2	0.005		0	0
0.95	0	0		4	0.01
Data in 1D
