# Supplementary material for: Aberrant sorting of hippocampal complex pyramidal cells in type I lissencephaly alters topological innervation
Source: eLife. 2020 Jun 19;9:e55173. doi: 10.7554/eLife.55173 (PMC7340499; doi:10.7554/eLife.55173)
Supplement: Figure 2—source data 1. [file elife-55173-fig2-data1.xlsx]

## Sheet: %cb_summary
	E12-13		E14-15		E16-17			Raw_fraction	0.510638	0.75	0.434389	0.503876	0.0947368	0.113095	(note: these would be raw fractions treating each cell as an observation)
	wt	lis	wt	lis	wt	lis		total_CB+	24	15	96	65	9	19	For these data, any number signifies a Neurog2 labelled cell (green), a 0 signifies it was calbindin negative, a 1 signifies calbindin expression.
avg % pos	0.09	0.12	0.42	0.52	0.54	0.71		total cells	47	20	221	129	95	168
sem	0.03	0.03	0.09	0.08	0.07	0.09			E16-17		E14-15		E12-13
n_slices	2	3	4	6	7	7			wt	lis	wt	lis	wt	lis
									1	1	0	1	0	0
									1	1	0	0	0	0
(note: the raw values to the right, are grouped by SLICEs in which they are counted, and then averaged)									0	1	0	1	0	0
This makes the values slightly different than the raw fractions, but I believe is more appropriate treatment of N.									0	1	0	1	0	0
									0	1	0	1	0	0
									0	0	0	0	1	0
									0	0	0	0	0	0
									0	1	0	0	0	0
									0	1	0	0	0	0
Data in 2D									1	1	0	0	0	0
									0	1	1	0	0	0
									1	1	0	0	0	1
									1	1	0	0	0	0
									0	0	0	1	0	0
									1	1	0	1	0	0
									1	1	0	0	0	0
									1	1	0	0	0	0
									1	0	0	1	0	0
									0	1	0	1	0	0
									0	0	0	0	1	0
									1		0	1	1	0
									0		0	0	0	0
									1		0	1	0	0
									0		0	0	0	0
									1		0	1	0	0
									1		0	0	0	0
									0		1	0	0	0
									0		0	0	0	0
									0		0	1	0	1
									0		1	0	0	0
									1		1	0	0	0
									1		0	0	0	0
									0		1	1	0	1
									1		0	0	0	0
									0		0	0	0	0
									1		1	1	0	0
									1		0	0	0	0
									0		1	0	0	0
									1		0	0	0	0
									0		1	1	0	0
									0		0	1	0	0
									1		1	1	0	0
									1		1	0	0	0
									1		0	0	0	0
									1		0	0	0	0
									1		0	1	0	1
									0		0	0	0	0
											0	1	0	0
											0	0	0	0
											0	0	0	0
											0	0	0	1
											0	1	1	0
											0	0	1	0
											0	0	0	0
											0	0	1	0
											0	1	0	0
											0	0	0	0
											0	0	0	0
											0	1	0	0
											0	1	0	0
											1	1	0	0
											1	0	0	0
											0	1	0	0
											1	1	1	0
											0	1	0	0
											1	1	0	0
											1	1	0	0
											1	1	0	0
											1	0	0	0
											1	1	0	0
											0	1	0	0
											0	0	0	0
											0	0	0	0
											1	1	0	0
											1	1	0	0
											0	0	0	0
											1	0	0	0
											1	0	0	0
											0	1	0	1
											0	0	0	0
											0	1	0	0
											0	0	0	0
											1	0	0	0
											0	1	0	0
											1	1	0	1
											0	0	0	0
											0	1	1	1
											0	1	0	0
											0	0	0	1
											0	0	0	0
											0	0	0	0
											0	0	0	0
											0	1	0	0
											0	0	0	0
											0	0	1	0
											1	1		0
											1	1		1
											1	0		0
											0	0		1
											0	1		0
											0	1		0
											1	0		0
											0	1		0
											1	1		0
											1	1		0
											0	1		0
											1	0		0
											1	1		0
											1	1		0
											1	1		0
											1	1		0
											1	1		0
											1	0		0
											1	1		0
											0	1		1
											1	1		0
											0	1		0
											0	1		0
											0	0		0
											0	1		0
											1	0		0
											1	0		0
											1	0		0
											0	0		0
											1	1		0
											1	1		0
											1	1		0
											0	1		0
											0	1		0
											0			0
											1			0
											1			0
											0			0
											0			0
											0			0
											0			0
											1			0
											1			0
											0			1
											1			0
											1			0
											0			0
											0			1
											0			0
											0			0
											1			0
											1			0
											0			1
											0			0
											1			0
											1			0
											0			1
											1			1
											1			0
											1			0
											0			1
											1			0
											1			0
											1			0
											0			0
											0			0
											1			0
											0			1
											1			0
											0			0
											1			0
											1			0
											1			0
											1
											1
											1
											0
											0
											1
											1
											0
											0
											0
											0
											0
											0
											1
											1
											1
											0
											0
											1
											1
											1
											1
											1
											1
											1
											1
											1
											1
											0
											0
											1
											1
											1
											1
											0
											1
											1
											0
											0
											1
											0
											0
											1
											0
											1
											0
											0
											1
											0
											1
											0
											0

## Sheet: PCL_depth_singleexamples
Wt E12	Lis E12	Wt E14	Lis E14	Wt E16	Lis E16
37.8	18.3	0	326	0	39.8
19.1	74.9	37	149	3.7	132
26.8	22.8	6.6	13	0	118				Single experiment examples of the raw distributions of cell soma locations
9.36	12	36	15.6	2.1	159
9.39	52.8	63.3	44.8	0	16.4
5.62	10.2	18.3	114	4.2	88
11.2	123	32.5	119	11.1	104
22.3	10.2	29.3	102	0	109		Data in 2E
22.5	16.3	0	39.6	0	20
6.78	54.2	47.9	13.7		183
19.2	99.3		6.55		153
4.57	8.34		26.9		135
13.6	32.3		33.5		134
36.8	9.9		135		369
21.5	31
7.59	10.2
15.6	7.78
37.2	19
27.7	7.25
25.1	313
21.3	316
15.5	95.6
6.71	351
25.4	32.2
14.2	168
44	46.9
17.9	38.9
27.7	17.8
0	21.7
24.8	24.3
10.2	5.52
9.43	341
24.8	344
34.4	99.7
41.5	14.4
14.5	19.5
27.2	41.9
12.9	30.1
8.06	44.8
333	132
25.9	12.4
18.7	44.4
20.9	33.6
19.5	32.9
24.2	383
35.3	79.2
34	120
15.5	22.2
29.2	4.87
19	14.1
88.5	34
31.9	141
40.8	73.2
13.5	15
61.1	29.4
84.7	29.4
84.5	28.2
87.5	54.3
109	30.2
75.1	13.3
0	64

## Sheet: PCL_depth_summary
PCL depth, measured from front of PCL and frontmost PCL in Lis mice												Summary averages
E12				E14				E16					E12		E14		E16
wt		lis		wt		lis		wt		lis			mean	sem	mean	sem	mean	sem
12.2		18.3		25.9		266		7.34		39.8		WT	25.4	1.4	20.5	1.3	15.6	2.6
31.1		74.9		12.2		10.5		11.6		132		LIS	50	12.3	88	8.7	111.6	18.3
18.2		22.8		17.9		17.1		32.4		118
17.1		12		27		82.7		14.2		159
39.4		52.8		18.9		120		31.6		142
14.1		10.2		37		34.8		91.2		12.2
17.6		123		36.4		87.6		16		13.2		Data in 2F
23.6		10.2		19.8		97.2		11.2		142
3.19		16.3		18		35.6		72.7		34.7
23.1		54.2		24.6		8		1.87		127
25.2		99.3		6.91		17		1.87		16.4
36.9		8.34		5.29		82.4		4.16		88
26.9		32.3		18		98.2		9.52		104
39.3		9.9		12.6		326		9.36		109
15		31		8.92		149		6.31		20
11.8		10.2		24.6		13		7.3		183
31		7.78		19.2		15.6		7.99		153
38.8		19		15		44.8		11.4		135
55.7		7.25		3.84		114		11.2		134
43.9		313		26		119		28.2		369
20.8		316		44.3		102		5.48
34.7		95.6		15		39.6		14
35.4		351		33.2		13.7		18.8
14.3		32.2		11.2		6.55		16.6
13.7		168		49.9		26.9		16.1
18.4		46.9		38.6		33.5		12.5
29.7		38.9		13.9		135		44.6
23.5		17.8		26		40.6		5.28
18		21.7		29.7		143		8.61
22.6		24.3		11.2		156		9.53
31.8		5.52		2.81		210		11
10.8		341		18.2		45		12.7
7		344		14.7		37.1		4.48
28.3		99.7		9.56		15.2		15
33.4		14.4		12.2		14.8		6.17
5.02		19.5		7.32		6.1		9.25
24.4		41.9		27		147		13
12.8		30.1		9		160		10
25		44.8		27.9		17.4		9.34
39.1		132		3.67		13		8.99
21.9		12.4		16.2		8.23		5.65
24.7		44.4		10.5		14.1		9.83
23.8		33.6		18.3		10.4		17.9
19.2		32.9		21.2		3.16
18.5		383		23.6		6.19
37.8		79.2		17.1		27.6
19.1		120		29.8		8.25
26.8		22.2		32.1		9.12
9.36		4.87		20.7		144
9.39		14.1		36		17.2
5.62		34		17.8		97.4
11.2		141		28.6		10.2
22.3		73.2		23.4		68
22.5		15		20.4		129
6.78		29.4		36.7		19.5
19.2		29.4		13.7		11.2
4.57		28.2		24.8		138
13.6		54.3		27.8		18.9
36.8		30.2		15.5		16.4
21.5		13.3		19.5		23.9
7.59		64		19.4		32
15.6		38.1		15.9		10.6
37.2		28		22.3		76.4
27.7		36.1		19.2		37.5
25.1		28		27.8		29.9
21.3		29.1		29.1		83.7
15.5		21.9		27.5		41.8
6.71		42.6		9.7		67.2
25.4		28.3		11.4		16.3
14.2		52.1		16.4		79.6
44		28.9		21.1		76.9
17.9		42.7		21.2		44.6
27.7		27.6		15.5		124
0		54.3		24.2		121
24.8		65.5		18.1		137
10.2		24.8		13		142
9.43		58		18		169
24.8		47.8		12.8		120
34.4		30.4		17.3		137
41.5		31.3		24		109
14.5		62.5		16.6		98.9
27.2		49.1		10.8		105
12.9		10.2		10.6		445
8.06		43.2		9.36		118
333		13.8		10		126
25.9		36.3		10.5		44.9
18.7		13.7		29.8		224
20.9		34.3		23.2		115
19.5		24.2		50		125
24.2		42.5		41.9		17.6
35.3		23.7		32.9		142
34		18.5		14		160
15.5		40.9		13.1		9.46
29.2		31.5		27.6		49.4
19		39.5		33.4		158
		13.3		15.9		84.6
		36.6		12.2		99.7
		31.8		26		127
		7.06		20		125
		8.17		17.1		30.4
		47.8		14.1		151
		45.3		21.5		162
		10.1		33		518
		44.6		24.6		490
		16.8		17.4		84.9
		15.2		12.2		84.2
		17.8		21.8		94.5
		27.8		26		118
		36.2		17		170
		19.5		11.2		160
		9		21		14.5
		16		15		17
		31.8		23.2		36.5
		30.3		17.8		16.7
		27.4		23.4		13.3
		38.9		16.9		146
		12.6		15.9		80.2
		16.3		6.87		26.2
		35.3		11.2		50.4
		26.8		15.1		46
		28.3		9.74		67.3
		26.7		14.8		134
		12.3		12.4		31.9
		17		29.7		138
		36.6		24.4		158
		17.9		38.7		125
		31.9		14.2		125
		342		15.9		79.7
		31.5		19		72.1
		36.6		6.16
		10.4		24.8
		12		24.3
		27		11.3
		48.6		38.9
		9.13		18.5
		33.5		10.1
		6.57		16.4
		6.75		30.2
		27.7		0.936
		77.3		7.85
		70.8		23.6
		140		10.8
		14.8		32.9
		15.8		43.2
		44.5		33.6
		8.72		33.7
		167		27.6
		6.88		26.2
		36.4		17.8
		1.87		47.6
		9.73		21.9
		24.2		27.1
		365		12.3
		8.45		15.6
		2.81		24.5
		12.7		34.4
		18.7		36.4
		9.84		32.8
		47		43.3
		20.1		44.5
		54.8		36.1
		45		29.6
		80.8		13.3
		19.9		14.9
		17.8		17.8
		34.2		14.8
		65.6		14.5
		24.6		8.4
				24.3
				25.3
				12.3
				11.5
				14.7
				34.8
				19.8
				22.8
				42.7
				28.6
				21.7
				25.7
				30.8
				29
				22.9
				22.1
				22.6
				12.9
				27.8
				15.4
				20.5
				16.5
				9.36
				9.36
				19.4
				9.81
				12.7
				8.17
				3.96
				9.41
				16.2
				0
				19.2
				9.47
				19.7
				22.9
				30.2
				17.4
				20.6
				16
				17.2
				26.6
				13.5
				18.1
				17.5
				19
				21.2
				19
