# Supplementary material for: Aberrant sorting of hippocampal complex pyramidal cells in type I lissencephaly alters topological innervation
Source: eLife. 2020 Jun 19;9:e55173. doi: 10.7554/eLife.55173 (PMC7340499; doi:10.7554/eLife.55173)
Supplement: Figure 3—source data 1. — Somatic positions and bifurcation distances. [file elife-55173-fig3-data1.xlsx]

## Sheet: PC_morph_kmeans
WT							LIS
Genotype	Max LRI	Max ORI		Clusters			Genotype	Max LRI	Max ORI		Clusters
wt	-1.18572	-2.02341		1			lis	1.41388	-0.223144		0
wt	0.009166	-1.41337		1			lis	1.24873	-0.76374		0
wt	-1.05542	-1.60944		1			lis	0.013442	-0.241239		0
wt	1.66187	1.09861		0			lis	0.337346	-0.223144		0
wt	-0.338803	-0.34484		0			lis	1.52948	-1.00982		0
wt	1.8518	-1.46634		0			lis	0.798526	-1.24257		0
wt	-1.90841	-1.12799		1			lis	1.3128	0.652325		0
wt	-0.874181	-0.193048		1			lis	-0.368669	0.331761		0
wt	-0.071702	-0.628609		0			lis	1.20699	-1.14857		0
wt	0.979975	0.594301		0			lis	-2.08494	-2.0149		1
wt	1.60541	0.162882		0			lis	-0.710632	-0.885519		1
wt	-1.09811	-2.11337		1			lis	0.997775	0.516524		0
wt	1.39548	0.217107		0			lis	0.696645	-1.58059		0
wt	0.391117	-0.287682		0			lis	-0.364217	-0.76214		1
wt	-0.565091	-1.97556		1			lis	-2.10099	-2.16905		1
wt	1.20148	0.102857		0			lis	-0.887737	-0.71562		1
wt	-2.35654	-1.03212		1			lis	1.4046	-0.006079		0
wt	0.666056	0.336472		0			lis	-0.259512	0.336472		0
wt	0.531409	0.305382		0			lis	-1.14195	-1.52606		1
wt	0.743806	-0.996333		0			lis	0.078423	-1.89712		1
wt	1.54109	0.998071		0			lis	-1.54699	-1.20397		1
wt	-0.69179	-1.32176		1			lis	-1.63813	-1.27297		1
wt	1.08117	-0.510826		0			lis	0.200117	-0.510826		0
wt	-2.4897	-3.4577		1			lis	-1.57119	-3.14083		1
wt	-0.177754	-1.57937		1			lis	-0.550423	-2.47156		1
wt	-0.457622	-2.31709		1			lis	2.02113	0.391076		0
wt	-3.65081	-3.17407		1			lis	-1.7121	-2.36981		1
wt	-0.185408	-0.547518		0			lis	-0.835929	-1.49165		1
wt	-0.523061	-1.59434		1			lis	-0.838016	-1.05992		1
wt	-0.577178	-1.00523		1			lis	-1.23988	-2.19722		1
wt	-2.55308	-1.38109		1			lis	-1.47248	-0.916291		1
wt	0.184736	-0.916291		0
							Additional Cb-cre:ai14 recordings
							lis	-0.095511	-1.20397		calbindin negative
							lis	1.36033	-1.09861		calbindin positive
							lis	-1.71802	-2.22848		calbindin negative
							lis	1.20592	0.374693		calbindin positive
Data in 3B							lis	0.244386	0.538997		calbindin positive
							lis	-0.628759	-1.48428		calbindin negative
							lis	-0.685788	0.182322		calbindin positive
							lis	-1.04814	-0.798508		calbindin negative

## Sheet: Somatic_depth & bifurc_dist
PCL Somatic depth (from front of PCL), in um						Apical bifurcation distance (um)
wt_complex	wt_simple	lis_complex	lis_simple			wt_complex	wt_simple	lis_complex	lis_simple
55	48	36	149			47	87	143	38
26	13	108	44			214	90	156	514
49	46	165	182			142	437	198	457
68	78	132	118			156	402	36	294
1	61	188	148			76	204	378	236
10.5	76	193	56			253	348	331	435
8	17	201	59			68	314	449	390
26	48	1	61			63	280		316
9	70		71			142	537		495
44	28		95			217	265		507
112	65		54			415	291		134
22			101						539
43			44						441
Data in 3D 3E

## Sheet: Sholl
Distance	Wt, C		Wt, S		Lis, C		Lis, S			Values represent sholl interactions for circles at 25um steps. Only apical branches are considered (not basal dendrites)										Actual raw sholls per cell		WT																											Lis
	average	sem	average	sem	average	sem	average	sem			n cells												SIMPLE														COMPLEX
25	0.9	0.179505	0.928571	0.0714286	1.5	0.223607	0.916667	0.0833333		wt, c	10											25	1	1	1	1	1	1	1	1	1	1	0	1	1	1	1	2	1	1	1	1	0	1	1	0			25
50	2.3	0.422953	1.85714	0.572801	4.41667	0.861172	2.75	0.686725		wt, s	12											50	9	2	1	3	2	1	1	1	1	1	1	1	1	1	4	3	1	2	2	4	1	1	4	1			50
75	4.4	1.07703	3.28571	0.744419	6.66667	1.0631	3.58333	0.743235		lis, c	10											75	10	3	5	8	3	1	2	4	4	1	2	1	1	1	8	9	2	3	3	8	1	1	8	1			75
100	6.5	1.08781	5.64286	1.18418	7.25	1.09868	5.08333	1.06215		lis, s	12											100	13	4	10	13	4	1	7	7	8	1	8	1	1	1	12	9	8	4	7	8	5	1	9	2			100
125	7.4	0.85894	6.85714	1.22186	7.08333	1.26865	6.08333	0.972799														125	15	8	10	16	5	3	10	7	6	3	6	4	2	1	12	7	8	7	11	6	6	5	9	3			125
150	9	1.23828	6.85714	0.976972	6.66667	0.988095	5.58333	0.645008														150	9	11	11	15	3	5	8	7	6	4	7	4	4	2	13	8	10	5	16	5	10	7	12	4			150
175	9	1.49071	6.71429	0.867158	4.58333	0.61378	5.08333	0.712														175	10	10	9	15	3	6	5	6	5	5	6	6	3	5	12	7	11	6	18	3	10	7	13	3			175
200	9.1	1.68292	6.35714	0.887069	4.16667	0.499507	4.33333	0.731679		Data in 3F, 3G, 3H												200	10	13	9	11	2	7	4	6	3	5	7	3	4	5	15	5	9	6	15	3	12	9	16	1			200
225	9	1.42205	6.07143	0.835111	3.41667	0.556475	4.16667	0.877612														225	13	10	7	8	0	7	5	5	4	4	6	3	6	7	14	5	9	9	15	3	11	9	13	2			225
250	8.1	1.16857	6.69231	0.701506	2.90909	0.591928	3.4	0.791623														250	11	11	6	7		7	8	7	5	4	5	2	6	8	10	8	8	7	13	2	9	10	12	2			250
275	7.1	0.99387	6.92308	0.73782	3	0.422507	3.44444	0.626079														275	11	13	5	6		7	7	6	6	4	8	3	7	7	8	6	7	9	11	2	7	6	12	3			275
300	6.1	1.12002	6.15385	0.677913	3.4	0.30424	3.625	0.595744														300	11	8	4	7		6	7	4	5	3	9	3	5	8	5	5	4	10	13	1	4	6	9	4			300
325	5.7	1.21152	5.23077	0.7085	2.7	0.472377	2	0.267261														325	10	6	3	5		4	7	1	5	2	9	4	6	6	4	3	4	10	13	0	5	4	9	5			325
350	4.22222	0.795435	4.69231	0.592524	2.7	0.543937	1.625	0.375														350	9	5	3	3		4	4	1	6	3	7	5	4	7	2	2	3	7	9		3	4	5	3			350
375	3.66667	0.707107	3.53846	0.461538	3.1	0.884205	1.42857	0.297381														375	7	4	4	3		2	1	1	4	3	4	5	5	3	3	3	4	8	6		2	3	1	3			375
400	3.66667	0.866025	3.23077	0.544834	3.44444	0.884433	2.16667	0.307318														400	7	5	5	4		1	2	1	3	1	3	5	4	1	3	5	4	9	5		1	4	1	1			400
425	3.66667	0.745356	2.92308	0.645115	2.88889	0.706321	2.16667	0.401386														425	3	8	4	6		1	1	1	3	1	3	5	2	0	2	5	5	7	6		1	4	2	1			425
450	3.66667	0.833333	2.41667	0.583333	3	0.408248	1.83333	0.401386														450	2	3	2	8		1	0	1	3	1	3	3	2		2	6	5	7	6		1	4	2	0			450
475	4.125	0.692756	2.54545	0.835177	2.875	0.547159	1.66667	0.210819														475	1	2	1	10		1		1	3	1	5	2	1		2	7	4	7	3		4	4	2				475
500	3.25	0.453163	2.36364	0.664321	3	0.566947	1.66667	0.333333														500	1	2	1	8		1		1	4	2	4	1	1		2	6	4	3	2		3	3	3				500
525	2.75	0.453163	2.45455	0.492925	2.71429	0.49099	2	0.365148														525	1	2	2	6		1		1	4	2	4	1	3		2	5	4	3	2		1	2	3				525
550	1.5	0.5	2.54545	0.492925	3.14286	0.515388	2.16667	0.307318														550	1	2	3	5		1		0	5	2	4	2	3		1	0	4	2	1		1	0	3				550
575	1.33333	0.557773	3.1	0.657436	1.85714	0.440677	2.16667	0.542627														575	1	0	4	5		1			7	3	3	3	4		1		4	1	1		0		1				575
600	1.6	0.6	3.77778	0.741204	2.66667	0.719032	3	0.707107														600	2		2	2		1			7	3	6	5	6		1		4	1	1				1				600
625	0.8	0.374166	2.88889	0.806991	1.66667	0.528121	3.6	0.748331														625	1		1	2		1			6	1	2	5	7		1		2	1	0				0				625
650	0.333333	0.333333	2.66667	1	2.6	0.792324	3.6	0.927362														650	1		0	0		1			7	1	2	4	8		0		1	0									650
																							0					1			1	1	1	4	7				0
																												0			1	0	1	1	5
																															0		1	0	4
																																	0		2
																																			0
[truncated: 22 more columns]
