# Supplementary material for: Aberrant sorting of hippocampal complex pyramidal cells in type I lissencephaly alters topological innervation
Source: eLife. 2020 Jun 19;9:e55173. doi: 10.7554/eLife.55173 (PMC7340499; doi:10.7554/eLife.55173)
Supplement: Figure 4—source data 1. [file elife-55173-fig4-data1.xlsx]

## Sheet: Eprops_type
Resting membrane potential						Sag Index						R input
wt_c	wt_s	lis_c	lis_s			wt_c	wt_s	lis_c	lis_s			wt_c	wt_s	lis_c	lis_s
-64	-59	-48	-68			0.744249	0.93	0.754	0.76			98.5835	205	221	164.5
-59	-52	-66	-68			0.908	0.789	0.742	0.798			90.1	110.313	248	70
-70	-63	-63	-58			0.66	0.799	0.773	0.85			119	131.101	128.419	185
-66	-57	-73	-62			0.7	0.697	0.757	0.8			125.6	106.144	152	150.605
-67	-64	-61	-51			0.71	0.741	0.684	0.832			161	168.886	206.411	186.067
-64	-62	-61	-59			0.64	0.814	0.7	0.779			115.5	145.647	210.95	250
-65	-64	-63	-54			0.78	0.752	0.847	0.846			107.631	245.561	208	162.623
-58	-62	-56	-61			0.752332	0.85	0.89	0.846			157.768	79.2	143.7	151
-63	-63	-56	-61			0.759042	0.738344	0.79	0.82			127.877	158.126	166	96
-63	-56	-65	-58			0.768926	0.812455	0.817	0.77			101.92	117.327	77.429	138.8
-57	-56		-61			0.796232	0.748976	0.81	0.88			119	203.782	175	188.7
	-65		-70			0.82	0.755054	0.77	0.764				120.81	117.2	121.758
			-63					0.78	0.80211					181	106.904
Data in 4B

## Sheet: Eprops_position
WT			LIS			WT			LIS			WT			LIS
PCL depth	RMP		PCL depth	RMP		PCL depth	Sag_Index		PCL depth	Sag_Index		PCL depth	Rin		PCL depth	Rin
9	-64		48	-48		9	0.744249		48	0.754		9	98.5835		48	221
26	-59		132	-66		70	0.908		132	0.742		26	90.1		132	248
1	-70		188	-63		26	0.66		188	0.773		1	119		188	128.419
10.5	-66		1	-73		1	0.7		1	0.757		10.5	125.6		1	152
8	-67		143	-61		10.5	0.71		108	0.684		8	161		108	206.411
68	-64		56	-68		8	0.64		165	0.7		68	115.5		165	210.95
46	-59		148	-68		68	0.78		143	0.847		46	205		143	208
52	-52		59	-58		46	0.93		56	0.76		52	110.313		56	164.5
48	-63		101	-62		52	0.789		148	0.798		48	131.101		148	70
70	-57		54	-59		48	0.799		59	0.85		70	106.144		59	185
17	-64		71	-54		70	0.697		101	0.8		17	168.886		101	150.605
61	-62		95	-61		17	0.741		54	0.779		61	145.647		54	250
76	-64		36	-61		61	0.814		71	0.846		76	245.561		71	162.623
78	-62		20	-63		76	0.752		95	0.846		78	79.2		95	151
16	-65		262	-56		78	0.85		36	0.89		16	107.631		36	143.7
49	-63		201	-61		16	0.752332		20	0.79		49	158.126		20	166
44	-58		44	-58		49	0.738344		262	0.81		44	157.768		262	175
55	-63		182	-61		44	0.759042		201	0.82		55	127.877		201	96
26	-63		118	-65		55	0.768926		44	0.77		26	101.92		44	138.8
48	-57					26	0.796232		182	0.88		48	119		182	188.7
28	-56					48	0.82		118	0.78		28	117.327		118	181
43	-56					28	0.812455					43	203.782
13	-65					43	0.748976					13	120.81
						13	0.755054
Data in 4A

## Sheet: Eprops_kmeans
WT Principal components						WT data used to make principal components												LIS Principal components
PC1	PC2	E_phys_cluster	Shape_cluster			genotype	RMP	Sag_Index	Rin	Spike_Amp	Adap_Ratio	Freq_2x_Thresh	Spike_Thresh	AHP_amp				PC1	PC2	E_phys_cluster	Shape_cluster			genotype	RMP	Sag_Index	Rin	Spike_Amp	Adap_Ratio	Freq_2x_Thresh	Spike_Thresh	AHP_amp
-0.023339	-1.91307	0	0			wt	-64	0.744249	98.5835	79.4	0.350116	31.25	-46.2	-7.1447				-0.640725	-0.209369	1	0			lis	-66	0.742	248	90.33	0.356585	21.25	-46.69	-3.57245
-1.41095	-0.604007	0	0			wt	-59	0.66	90.1	100.6	0.256771	11.25	-45	-3.5				0.227787	1.66279	1	0			lis	-73	0.757	152	69.19	0.2699	21.25	-41.63	-1.43
-1.78682	-0.032064	0	0			wt	-66	0.71	125.6	95.1	0.314969	13.75	-47.5	-4.4				0.635601	-0.825098	1	0			lis	-61	0.847	208	102.96	0.358557	25	-43.51	-7.8816
-3.17037	-0.388237	0	0			wt	-67	0.64	161	84.66	0.280791	13.75	-48.16	-0.84				-1.64695	1.09083	1	1			lis	-68	0.76	164.5	95.1	0.235238	18.75	-52.5	-2.1
0.128733	2.80634	1	1			wt	-59	0.93	205	106.4	0.488242	16.25	-46.7	-1.6				1.47836	2.83634	1	1			lis	-68	0.798	70	70.08	0.600936	22.5	-47	-6.52783
2.23272	0.244993	1	1			wt	-52	0.789	110.313	94.15	0.56407	30	-45.14	-8.0827				0.244843	-1.2275	1	1			lis	-58	0.85	185	82	0.359212	17.5	-44	-2.2
0.570509	0.683316	1	1			wt	-63	0.799	131.101	93.23	0.545438	22.5	-47.24	-7.3559				0.10386	-0.328753	1	1			lis	-62	0.8	150.605	80.6	0.19678	20	-43.52	-3.99587
-0.070318	-0.574931	0	1			wt	-57	0.697	106.144	91.99	0.35297	33.75	-49.25	-6.2004				3.42963	-1.85824	0	1			lis	-51	0.832	186.067	72.14	0.642	25	-37.32	-13.6444
-0.121947	0.689182	1	1			wt	-64	0.741	168.886	97.26	0.373316	18.75	-45.65	-11.5705				-0.127442	-1.86333	1	1			lis	-59	0.779	250	93.23	0.296497	18.75	-42.94	-6.37641
1.96659	0.085509	1	1			wt	-62	0.814	145.647	91.7	0.549001	23.75	-41.99	-12.0871				3.76777	-1.85347	0	1			lis	-54	0.846	162.623	57.34	0.348	30	-34.54	-12.1214
-2.24341	0.516098	0	1			wt	-64	0.752	245.561	72.48	0.345675	21.25	-48.55	-2.0787				0.802996	-0.287627	1	1			lis	-61	0.846	151	91.48	0.351879	20	-42.9	-7.91177
0.138773	-1.33451	0	0			wt	-65	0.752332	107.631	92.8	0.323574	22.5	-42.6	-8.3338				0.386879	-0.090363	1	0			lis	-61	0.89	143.7	69.8	0.427222	16.25	-47.4	0.1
0.217206	0.014826	1	1			wt	-63	0.738344	158.126	94.71	0.439938	26.25	-44.29	-7.0406				-0.520643	0.457102	1	0			lis	-63	0.79	166	88.2	0.436369	17.5	-49.4	-2.9
0.984708	0.259521	1	0			wt	-58	0.759042	157.768	96.13	0.441066	32.5	-45.35	-8.1168				-0.806095	-1.54731	1	0			lis	-56	0.81	175	80.7	0.221162	15	-46.9	-0.1
-0.686927	-1.21038	0	0			wt	-63	0.768926	127.877	91.19	0.212675	26.25	-45.02	-5.5781				-1.69167	0.884639	1	1			lis	-61	0.82	96	99	0.316158	17.5	-50.5	4.9
1.14272	-1.04466	1	0			wt	-63	0.796232	101.92	94.35	0.402407	30	-43.54	-8.7366				-0.089121	0.163429	1	1			lis	-58	0.77	138.8	98.9	0.526352	16.25	-46.2	-6.3
-0.238778	-2.38405	0	2			wt	-61	0.758	73.9781	76.12	0.346914	21.25	-43.67	-3.14397				-0.4926	-1.07581	1	1			lis	-61	0.88	188.7	94.6	0.310867	13.75	-43	-0.4
1.3668	-0.224952	1	1			wt	-56	0.812455	117.327	96.61	0.382948	31.25	-45.37	-8.3409				-0.378736	3.16466	1	1			lis	-70	0.764	121.758	97.12	0.674	23.75	-51.53	-1.1128
1.06449	2.91983	1	1			wt	-56	0.748976	203.782	96.61	0.666667	16.25	-47.92	-11.3757				1.68921	1.24226	1	1			lis	-63	0.80211	106.904	86.35	0.355972	37.5	-41.61	-3.86119
-0.067498	-0.983641	0	1			wt	-65	0.755054	120.81	92.66	0.310593	23.75	-44.14	-8.7775				-2.55366	0.572769	1	0			lis	-65	0.78	181	103.9	0.278836	15	-57.1	-0.4
-1.32498	0.578475	0	2			wt	-66	0.723	186.946	82.93	0.405011	17.5	-48.48	-8.0386				0.026825	0.987527	1	2			lis	-68	0.83	180	78.7	0.522608	15	-48.7	-3.6
-0.218579	2.01696	1	2			wt	-48	0.7	120	98.3	0.459287	8.75	-50.9	-7.1				-2.11598	0.277165	1	2			lis	-62	0.74	166.7	106.2	0.333987	12.5	-52.4	-3.1
4.11547	-0.303737	1	2			wt	-55	0.826	104.767	80.17	0.688	25	-41.96	-18.9836				-0.900892	-1.14741	1	2			lis	-60	0.75	212.9	81.3	0.263875	15	-46.8	-2.6
-0.898548	0.465581	0	2			wt	-63	0.730921	162.286	94.23	0.400033	22.5	-47.17	-4.2521				-1.45335	1.33542	1	2			lis	-66	0.67	148	95.6	0.361613	16.25	-47.7	-2.9
-0.044839	1.41402	1	2			wt	-68	0.761	158	95.94	0.547993	16.25	-48	-11.0515				7.44489	1.59787	0	2			lis	-66	0.914907	144.156	56.04	0.914907	47.5	-27.1	-15.6856
1.74014	-1.38999	1	2			wt	-55	0.751	91.4983	85.33	0.507182	15	-38.35	-7.36533				1.275	0.817608	1	2			lis	-65	0.795	172.073	88.93	0.61356	18.75	-43.7	-11.2927
-2.13802	0.671943	0	2			wt	-62	0.78	148.5	91	0.291661	15	-50.5	-1				-0.208959	-0.786129	1	2			lis	-61	0.77	167.3	83.2	0.215008	15	-41.4	-4.5
-1.22354	-0.97836	0	2			wt	-60	0.87	128.1	88.3	0.219388	13.75	-42.9	2.7				0.501988	0.619599	1	2			lis	-61	0.839	130.134	90.43	0.56921	17.5	-45.38	-3.93641
																		-2.08333	1.47579	1	2			lis	-65	0.7	109.5	106	0.268568	16.25	-48.1	0.2
																		-0.777094	0.051795	1	2			lis	-63	0.73	154	85.7	0.2206	16.25	-44.7	-3.6
																		-0.15028	-0.922233	1	2			lis	-62	0.79	193.023	82.08	0.094061	25	-44.48	-2.94432
																		-0.890355	-1.04005	1	2			lis	-58	0.83	170.2	97.2	0.25696	17.5	-45.6	0.1
																		3.02985	-0.584078	0	2			lis	-63	0.794	162.929	54.74	0.294405	23.75	-34.23	-12.8586
																		-0.730124	-1.22861	1	2			lis	-56	0.8	159.1	89.7	0.256509	16.25	-44.5	-0.1
																		0.07065	-1.54349	1	2			lis	-54	0.96	108.7	97	0.236112	15	-42.2	-0.2
																		-2.65874	-0.454474	1	2			lis	-61	0.7	204.9	100.7	0.243384	12.5	-53.4	-1.5
																		-2.12321	-0.447757	1	2			lis	-62	0.76	183.5	86.8	0.17213	13.75	-51.7	1.5
																		-0.674641	0.421981	1	2			lis	-63	0.81	146.4	87.4	0.370274	16.25	-47.9	-0.7
Data in 4C 4D																		0.153813	-0.091247	1	2			lis	-63	0.84	180.9	90.4	0.347157	22.5	-47.1	-4.5
																		-0.064188	0.508486	1	2			lis	-65	0.84	148.2	86.9	0.345987	17.5	-46.9	-4.1
																		-1.49118	-0.755693	1	2			lis	-60	0.7	167	75.4	0.133449	13.75	-45.3	1.1
