# Supplementary material for: Aberrant sorting of hippocampal complex pyramidal cells in type I lissencephaly alters topological innervation
Source: eLife. 2020 Jun 19;9:e55173. doi: 10.7554/eLife.55173 (PMC7340499; doi:10.7554/eLife.55173)
Supplement: Figure 5—source data 1. — Inhibitory puncta quanitification for CB+ and CB- somas, in mutant and Wt animals. [file elife-55173-fig5-data1.xlsx]

## Sheet: Interneuron soma postions
Wt, normalized depth measurements from separate stained slices															Lis, normalized depth measurements from separate stained slices
Parvalbumin stain															Parvalbumin stain
0.150493	0.222343	0.0282892	0.0690156	0.160718	0.0443008	0.282867	0.172771	0.195474	0.290897	0.0980022	0.165134	0.300321			0.169736	0.00414163	0.0884211	0.0466144	0.266965	0.242415	0.229161	0.277319	0.249039	0.271784	0.0949795	0.212811	0.137185	0.177606	0.148708	0.372483
0.194185	0.253733	0.28575	0.225617	0.210994	0.291235	0.262177	0.237304	0.346033	0.10523	0.141726	0.149211	0.382526			0.13667	0.16233	0.138947	0.278325	0.563523	0.234012	0.257122	0.19954	0.244624	0.296501	0.333569	0.319216	0.248041	0.288055	0.230198	0.335361
0.213603	0.260048	0.309997	0.26055	0.219142	0.299852	0.323588	0.177935	0.336142	0.336509	0.219245	0.45589	0.310131			0.163123	0.229307	0.176842	0.458282	0.590982	0.233041	0.282782	0.255097	0.625763	0.477413	0.400127	0.250524	0.279912	0.228005	0.138033	0.412448
0.230594	0.241737	0.211577	0.270739	0.312095	0.282115	0.342522	0.276379	0.205366	0.290034	0.265985		0.207445			0.165327	0.320842	0.166316	0.710458	0.244384	0.224694	0.253523	0.30113	0.591038	0.467145	0.37201	0.397336	0.311783	0.293392	0.191257	0.36866
0.269431	0.272044	0.265543	0.27365	0.374546	0.341211	0.0650094	0.291679	0.395359	0.365162	0.257304		0.269489			0.227049	0.343167	0.248421	0.55879	0.170245	0.333666	0.257623	0.617477	0.67584	0.201686	0.372593		0.339498	0.364651	0.340931	0.283753
0.271858	0.286206	0.254011	0.216882	0.301498	0.192503	0.277494	0.347989	0.317873	0.0736818			0.36092			0.355815	0.363584	0.315789	0.308068	0.356966	0.364228	0.319806	0.209747	0.25485	0.307078	0.383965		0.344802	0.409177	0.265611	0.237611
0.303413	0.316512	0.321284	0.279473	0.336977	0.432546	0.324961		0.291762	0.0254083						0.21694	0.396328	0.277895	0.291271		0.189831	0.154927	0.342544	0.252137				0.399084	0.3901	0.210722	0.193147
0.293704	0.332207	0.375843	0.280928	0.268595	0.383789	0.139964		0.304551	0.462557						0.392377	0.397072	0.344031	0.252573		0.305195	0.186219	0.644461	0.285311				0.347886	0.0422319	0.300536	0.294709
0.383515	0.368379	0.139779	0.556037		0.27661	0.242199		0.331954							0.332859	0.43056	0.283849	0.145285				0.165083	0.278871				0.440654	0.223928	0.379872	0.389615
0.213603	0.198422	0.232653	0.149925		0.297117	0.360257									0.31302	0.288	0.529295	0.328568				0.0936531	0.56053				0.480841	0.378903	0.280093	0.351329
0.752466	0.404692	0.307197	0.218339		0.331236										0.394581		0.555792	0.328568				0.453516	0.312312				0.521027	0.372294	0.315984	0.195991
0.750762		0.354453			0.280896										0.376946		0.504396	0.382212				0.473029					0.659599	0.375337	0.217381	0.384138
0.287427		0.383925													0.414421		0.282105	0.377742				0.578917					0.70077	0.359825	0.320489	0.318706
0.271858															0.290976		0.231579	0.375506									0.8051	0.301035	0.545017	0.31303
0.288498																	0.237895	0.381554										0.322419	0.288405	0.412937
0.286071																	0.332632	0.489028										0.288055	0.360896	0.356317
0.140081																	0.334376	0.319627										0.356259	0.357078
																												0.753491
CCK stain															CCK stain
0.270218	0.518508	0.314692	0.310776	0.316714	0.198773	0.329934	0.388803								0.357722	0.580026	0.19744	0.252617	0.264988	0.468103	0.194157	0.471677
0.380768	0.633136	0.502927	0.316421	0.0573142	0.295117	0.39524	0.24507								0.388781	0.317497	0.60604	0.505369	0.636145	0.7278	0.450693	0.611808
0.563953	0.35336	0.197784	0.45525	0.484694		0.424925	0.324599								0.730424	0.507211	0.493166	0.506438	0.637554	0.58942	0.376222	0.540611
0.31075	0.640663	0.624569	0.429434	0.438031		0.297728	0.46521								0.593894	0.624942	0.586959	0.344746	0.346048	0.230184	0.426222	0.513796
0.620553	0.527768	0.576019	0.361632			0.482471									0.625113	0.528042	0.441003		0.117807	0.283729	0.453111	0.425713
0.580239	0.549319	0.304624	0.361079			0.515622									0.709192	0.620104	0.448882		0.159386		0.489895	0.118527
0.625469	0.680838					0.723201									0.745391	0.589857	0.480617		0.548036		0.183804
0.434203	0.288554														0.701152	0.649274			0.427952
0.374348															0.658252	0.198106
															0.604623
															0.446013
															0.339735
Data in 5B

## Sheet: Inhibitory synapse quanti
		PV													CB1r
		WT		ratio	LIS
	Slice #	CB+	CB-		CB+	CB-									WT		ratio	LIS
	1	49	78	0.628205	30	45	0.666667							Slice #	CB+	CB-		CB+	CB-
	2	70	115	0.608696	40	57	0.701754							1	98	67	1.46269	57	46	1.23913
	3	69	90	0.766667	21	56	0.375							2	88	70	1.25714	43	40	1.075
	4	46	58	0.793103	21	50	0.42							3	76	60	1.26667	71	95	0.747368
	5	83	93	0.892473	64	65	0.984615							4	37	30	1.23333	48	52	0.923077
														5	82	59	1.38983	50	44	1.13636
	sum	317	434	0.737829	176	273	0.629607
	avg	63.4	86.8		35.2	54.6								sum	381	286	1.32193	269	277	1.02419
	sem	6.96132	9.35628	0.0531481	8.00875	3.38526	0.109857							avg	76.2	57.2		53.8	55.4
	ratio	0.730415			0.644689									sem	10.4518	7.10915	0.0444543	4.8518	10.0876	0.0860866
	Tests													ratio	1.33217			0.971119
	paired,w/in grp	0.0213965			0.03047									Tests
	unpaired, cross group	0.0294062	0.0084598		0.022851	0.00630763								paired,w/in grp	0.00867873			0.806175
														unpaired, cross group	0.102905			0.888042
			Test between geno
				0.401065												Test between geno
																	0.0152757
	***Puncta counts show,
	1. WT PV innervation bias for CB negative pricipal cells, ~0.73 ratio wise
	2. This ratio bias is maintained in CB+ principal cells in Lis1 mice, ~0.63
	3. These ratio groups are not significantly different from eachother (p = 0.4)
	4. Similar anaysis for CB1r puncta show, a preference for CB+ cells over CB- cells in WT, ~1.3 ratio
	5. This bias is not detected in Lis1 mutants when comparing normotopic CB- cells, to ectopic CB+ cells, ratio ~1 (no bias either way)
	6. Comparing ratios between CB+ and CB-, we see a significant difference between Lis and Wt, meaning the bias present in Wt mice is gone
	Methodologically -
	In each slice puncta on a total of 12 cells are counted - 6 are CB+ PCs, 6 are CB- PCs
	These 12 cells in a slice, result in 1 ratio'd value plotted in the figiure, by dividing puncta # on CB+'s / puncta # on CB-'s.
	In this manner, comparison's are relative and within slice - which can account for non-specific or biological differences in staining etc.
	The 5 points plotted in each bar graph are therefore taken from counts on a total of 70 cells. But the n used is still 5 for individual slices.
	Data in 5G 5H
