# Supplementary material for: Aberrant sorting of hippocampal complex pyramidal cells in type I lissencephaly alters topological innervation
Source: eLife. 2020 Jun 19;9:e55173. doi: 10.7554/eLife.55173 (PMC7340499; doi:10.7554/eLife.55173)
Supplement: Figure 6—source data 1. [file elife-55173-fig6-data1.xlsx]

## Sheet: Monosynaptic stim
Conotoxin							Agatoxin
wt simple	wt complex		lis simple	lis complex			wt simple	wt complex		lis simple	lis complex
85.6639	62.2724		82.05	11.892			8.4029	56.5064		17.7404	48.4494
84.4407	68.2162		48.5169	31.5217			9.57586	39.5397		11.8803	66.3473
94.4462	46.363		96.6793	22.5803			8.6705	13.6706		14.443	32.0052
77.3898	53.2203		57.7771	82.9042			11.4807	46.1089		5.57608	59.4595
74.5568	50.9468		70.8108	92.1179				43.639		10.453	33.557
19.8354	35.1628		88.7359					52.5905		9.09094	57.6419	revision exps
88.48	42.9049		55.0788							30.2001
79.7374	61.2044		85.7512
			82.0217
			47.0929
			50.7278
			10.0064
			7.84276
Data in 6D						Data in 6F

## Sheet: Disynaptic stim
WT, IE data									Lis, IE data
Geno	Morph	Epsc	Ipsc	IE_ratio	Somatic PCL depth				Geno	Morph	Epsc	Ipsc	IE_ratio	Somatic PCL depth
wt	C	-43.9494	300.088	6.82804	71.8				lis	C	-119.39	224.142	1.87739	160
wt	C	-35.0611	27.9558	0.797345	4.4				lis	C	-65.5013	323.664	4.94134	148
wt	C	-104.074	154.25	1.48212	11				lis	C	-118.377	532	4.49412	6
wt	C	-64.5989	256.031	3.9634	12				lis	C	-42.4505	126.649	2.98345	6.6
wt	C	-37.0977	33.7824	0.910633	10				lis	C	-36.2587	279.515	7.70891	176
wt	C	-35.32	101.5	2.87373	28.4				lis	C	-83.5647	20.4427	0.244633	15
wt	C	-179.696	326.262	1.81564	2.2				lis	C	-27.3722	26.2091	0.957506	156
wt	C	-82.5453	132.555	1.60584	17.2				lis	C	-18.2515	78.7994	4.31741	179
wt	C	-58.9388	199.905	3.39175	4.8				lis	C	-75.2207	155.05	2.06128	239
wt	C	-105.189	619.612	5.89046	16.5				lis	C	-92.9853	52.1748	0.561108	127
wt	C	-25.8051	80.135	3.10539	20.2				lis	C	-58.7028	162.577	2.76949	5
wt	C	-65	76	1.16923	55				lis	C	-65.2078	159.968	2.4532	199
wt	C	-99.116	505.321	5.09828	56				lis	C	-98.7518	27.0902	0.274326	15
wt	C	-81.2243	368.224	4.53342	8.5				lis	C	-79.0173	40.3423	0.51055	20
wt	C	-42.4058	117.278	2.76562	8				lis	C	-87.3148	502.36	5.75343	184
wt	C	-54.3835	267.35	4.91601	12				lis	C	-118.139	125.697	1.06397	11
wt	C	-136.2	40.5584	0.297786	4				lis	C	-46.2727	111.29	2.40509	156
wt	C	-55.8509	208.997	3.74205	2				lis	C	-9.97855	29.7172	2.97811	146
wt	C	-70.0154	209.421	2.99107	4				lis	C	-29.1411	68.684	2.35695	149
wt	C	-51.0725	65.3282	1.27913	17				lis	C	-54.3932	302.264	5.55702	61
wt	C	-23.9494	121.706	5.08181	5				lis	C	-69.9307	505.254	7.22507	180
wt	C	-8.7926	50.266	5.71685	1				lis	S	-86.7714	548.807	6.32475	44.1
wt	C	-28.6381	62.81	2.19323	1				lis	S	-33.4701	219.14	6.54734	73.7
wt	S	-39.2272	108.389	2.76311	65.4				lis	S	-28.4357	253.795	8.92522	5
wt	S	-33.9459	256.459	7.55493	9.1				lis	S	-51.6495	392.559	7.60044	13
wt	S	-20.8691	163.723	7.84523	37				lis	S	-71.0342	446.681	6.28825	14
wt	S	-37.9927	166.255	4.37597	38.9				lis	S	-72.7697	136.584	1.87694	46
wt	S	-197.273	921.183	4.66959	25				lis	S	-27.7243	36.0697	1.30101	127
wt	S	-37.3761	58.1966	1.55705	19				lis	S	-24.299	16.4122	0.675426	128
wt	S	-40.3332	229.664	5.69418	51				lis	S	-42.0871	50.454	1.1988	20
wt	S	-11.5611	81.4869	7.04837	99				lis	S	-44.6427	460.101	10.3063	20
wt	S	-36.022	95.2063	2.643	65				lis	S	-5.8654	27.3372	4.66076	92
wt	S	-33.77	347.206	10.2815	61				lis	S	-8.08307	30.4786	3.77067	118
wt	S	-103.273	700.33	6.78136	57				lis	S	-19.897	103.92	5.22291	45
wt	S	-80.0266	253.208	3.16405	45				lis	S	-38.0698	350.907	9.21747	28
wt	S	-29.439	441.544	14.9986	42				lis	S	-26.1257	74.9649	2.86939	2
wt	S	-34.4926	177.406	5.1433	30				lis	S	-24.6406	30.6917	1.24558	31
wt	S	-54.3871	165.047	3.03467	33				lis	S	-80.9895	601.475	7.42658	178
wt	S	-65.2675	59.4913	0.9115	5
wt	S	-31.109	12.2799	0.394737	1
wt	S	-62.9846	98.6952	1.56697	9
wt	S	-2.2645	45.509	20.0967	42
wt	S	-3.64398	16.2601	4.46218	23
wt	S	-1.01763	5.85975	5.75823	29
wt	S	-22.9082	64.2452	2.80446	1
wt	S	-36.1151	265.171	7.34239	36
Data in 6H 6I
