# Supplementary material for: Aberrant sorting of hippocampal complex pyramidal cells in type I lissencephaly alters topological innervation
Source: eLife. 2020 Jun 19;9:e55173. doi: 10.7554/eLife.55173 (PMC7340499; doi:10.7554/eLife.55173)
Supplement: Figure 7—source data 1. [file elife-55173-fig7-data1.xlsx]

## Sheet: LFP freq & pwr
Peak frequencies						Peak powers, normalized to baseline
WT_base	WT_wash	Lis_base	Lis_wash			WT_base	WT_wash	Lis_base	Lis_wash
27.8662	13.9331	33.8376	33.8376			1	1.01042	1	1.09862
21.8949	19.9045	29.8567	27.8662			1	0.871939	1	0.880058
19.9045	33.8376	33.8376	31.8471			1	0.959459	1	1.31372
31.8471	31.8471	31.8471	31.8471			1	0.963826	1	1.33456
31.8471	31.8471	27.8662	29.8567			1	0.732102	1	1.07657
31.8471	31.8471	29.8567	29.8567			1	1.05195	1	1.04797
27.8662	27.8662	33.8376	35.828			1	0.955227	1	0.919485
27.8662	27.8662	37.8185	35.828			1	1.02155	1	1.03258
27.8662	27.8662	21.8949	23.8853			1	1.17442	1	0.838317
15.9236	13.9331	29.8567	31.8471			1	0.992541	1	0.884669
27.8662	29.8567	25.8758	27.8662			1	0.805787	1	0.87539
29.8567	31.8471	35.828	37.8185			1	0.724142	1	1.00217
23.8853	23.8853	29.8567	27.8662			1	0.706033	1	0.850014
13.9331	13.9331	31.8471	31.8471			1	0.983083	1	1.08728
25.8758	23.8853					1	0.949883
13.9331	15.9236					1	0.851083
15.9236	13.9331					1	1.02472
15.9236	15.9236					1	1.08849
43.7898	45.7803					1	0.987409
21.8949	11.9427					1	0.828897
We normalized power and made in slice comparisons for the WIN-55 wash in experiments.
Power varies greatly by electrode placement, and we chose not want to make across genotype or experiment comparisons. Instead we assay the CCK responsiveness of the mutant slices relative to WT
as this speaks most directly to our earlier observations in the manuscript.
Data in 7D and 7E
