# Supplementary material for: Aberrant sorting of hippocampal complex pyramidal cells in type I lissencephaly alters topological innervation
Source: eLife. 2020 Jun 19;9:e55173. doi: 10.7554/eLife.55173 (PMC7340499; doi:10.7554/eLife.55173)
Supplement: Figure 8—source data 1. [file elife-55173-fig8-data1.xlsx]

## Sheet: Xcorr and Tshits
Cross correlation values, between radiatum and oriens electrodes in the same exp's					Time-shifts associated with the Xcorr peaks listed to the left
WT_xcorr_base	WT_xcorr_wash	LIS_xcorr_base	LIS_xcorr_wash			WT_tshift_base	WT_tshift_wash	LIS_tshift_base	LIS_tshift_wash
402.082	328.915	125.713	112.618			0	0.2	-1.3	8
1484.69	1433.11	335.34	341.972			-0.1	0.2	0.6	-0.4
145.741	147.276	788.652	1291.83			-1.5	-1.4	-0.6	-0.9
133.849	168.213	500.227	648.5			-1.4	-0.9	0.6	0.9
778.702	432.051	323.423	311.989			-0.9	-1.1	-0.7	-0.7
33.1217	46.9753	96.2021	59.5826			13.2	0.7	-5.4	6.1
203.882	201.986	329.249	275.738			6	5.3	-1.2	-1.1
109.337	124.098	375.78	384.674			5.4	5.3	0.4	0.3
337.091	469.987	504.092	446.398			-0.6	-0.1	-9.1	-11.3
156.612	147.268	216.988	205.524			-0.1	-0.6	0.2	0.3
587.506	396.789	785.739	648.893			0.9	1.3	-0.3	-0.1
32.0701	18.5662	663.181	692.163			3.5	6.2	-2.7	-2.9
133.858	92.6271	316.271	276.54			-1.5	-0.9	0	1.7
637.861	283.249	157.38	283.851			-1	0.3	-5.8	-5.6
215.812	176.963					-2.7	-2.1
760.088	581.962					1	1.2
349.888	344.491					0.7	0.9
255.828	277.765					0	0.2
804.266	799.875					0.2	0.1
328.986	205.15					-0.9	-1.3
Data in 8D and E
